# Supplementary material for: Cross-sectional survey of changes in knowledge, attitudes and practice of mask use in Sydney and Melbourne during the 2020 COVID-19 pandemic
Source: HighWire-hosted journal article supplement (doi:10.1136/bmjopen-2021-057860), 2022-06-01
Supplement: bmjopen-2021-057860supp001_data_supplement.pdf [file bmjopen-2021-057860supp001_data_supplement.pdf]

## Appendix

**Frame 1:** Survey questionnaire – Adapted from MacIntyre *et al.*, 2021<sup>24</sup>.

| Question                                                                                                          | Type            | Option                                                                                                                                                                                                                                                                                                                                                                                                                                                                                                                                                                                                                                                                   | Variable coded as      |
|-------------------------------------------------------------------------------------------------------------------|-----------------|--------------------------------------------------------------------------------------------------------------------------------------------------------------------------------------------------------------------------------------------------------------------------------------------------------------------------------------------------------------------------------------------------------------------------------------------------------------------------------------------------------------------------------------------------------------------------------------------------------------------------------------------------------------------------|------------------------|
| Are you aged 18 or older?                                                                                         | Multiple choice | 1 Yes<br>0 No                                                                                                                                                                                                                                                                                                                                                                                                                                                                                                                                                                                                                                                            | Binary                 |
| What is your city of residence?                                                                                   | Multiple choice | 1 Sydney, Australia<br>2 London, UK<br>3 New York City, NY, USA<br>4 Melbourne, Australia<br>5 Phoenix, AZ, USA                                                                                                                                                                                                                                                                                                                                                                                                                                                                                                                                                          | Categorical            |
| What is your gender?                                                                                              | Multiple choice | 1 Female<br>2 Male<br>3 Other                                                                                                                                                                                                                                                                                                                                                                                                                                                                                                                                                                                                                                            | Categorical            |
| What is your age?                                                                                                 | Open-ended      |                                                                                                                                                                                                                                                                                                                                                                                                                                                                                                                                                                                                                                                                          | Numerical              |
| Have you ever been told by a doctor or a nurse that you have any of the following lung conditions?                | Tick box        | 0 None<br>1 Asthma<br>2 Emphysema<br>3 Chronic Bronchitis<br>4 Chronic Obstructive Pulmonary Disease (COPD)<br>5 Bronchiectasis<br>6 Other chronic lung disease<br>7 Other                                                                                                                                                                                                                                                                                                                                                                                                                                                                                               | Binary for each option |
| Please indicate whether a doctor has ever diagnosed you with any of the following (please select all that apply): | Tick box        | 0 None<br>1 Diabetes<br>2 Hypertension (high blood pressure)<br>3 Heart disease (heart attack, angina, heart failure, arrhythmia or other)<br>4 Cancer (current or past)<br>5 Stroke<br>6 Other neurological condition (such as epilepsy, neuropathy, Parkinson's disease, dementia)<br>7 Kidney disease (such as stones, nephropathy, kidney failure, dialysis)<br>8 Liver disease (hepatitis, liver failure, cirrhosis)<br>9 Allergies (hay fever, eczema)<br>10 Dermatitis or other skin disease<br>11 Immunocompromised conditions (e.g., transplantation, regular corticosteroid use)<br>12 Other chronic lung diseases (fibrosis)<br>13 Other medical condition(s) | Binary for each option |

| Question                                                                                       | Type          | Option                                                                                                                                                                                                                                                                                                                                                                                                                                                                                                                                                                                                                                                                                                                                                                                                                                                                                                                                                                                                                                                               | Variable coded as      |
|------------------------------------------------------------------------------------------------|---------------|----------------------------------------------------------------------------------------------------------------------------------------------------------------------------------------------------------------------------------------------------------------------------------------------------------------------------------------------------------------------------------------------------------------------------------------------------------------------------------------------------------------------------------------------------------------------------------------------------------------------------------------------------------------------------------------------------------------------------------------------------------------------------------------------------------------------------------------------------------------------------------------------------------------------------------------------------------------------------------------------------------------------------------------------------------------------|------------------------|
| Have you ever experienced any negative issues while wearing a mask, N95 or P2?                 | Tick box      | 0 No<br>1 I felt embarrassed to wear it<br>2 I received negative comments when wearing it<br>3 I received racist comments when wearing it<br>4 People laughed at me<br>5 People stared at me<br>6 People thought I was infected<br>7 Other                                                                                                                                                                                                                                                                                                                                                                                                                                                                                                                                                                                                                                                                                                                                                                                                                           | Binary for each option |
| How severe do you think COVID-19 would be if you got it?                                       | Sliding scale | Scale 1-100                                                                                                                                                                                                                                                                                                                                                                                                                                                                                                                                                                                                                                                                                                                                                                                                                                                                                                                                                                                                                                                          | Numerical              |
| What measures have you taken for reducing your risk from COVID-19 during March and April 2020? | Tick box      | 0 None<br>1 Working from home<br>2 I was unable to work<br>3 Restricting visitors to my home<br>4 Avoiding crowded places or large gatherings<br>5 Avoiding close contact with sick people in my home<br>6 Avoid using public transport<br>7 Reduce or avoid going to hospitals or going to the doctor unless required<br>8 Keeping 1.5m/6 feet or more between myself and others<br>9 Wearing a mask or P2 or N95<br>10 Wearing a homemade cloth mask<br>11 Wearing gloves<br>12 Avoiding touching my eyes, nose, and mouth with unwashed hands<br>13 Taken herbal supplements<br>14 Taken vitamins<br>15 Wearing a face shield<br>16 Washing my hands frequently<br>17 Using hand sanitizer to clean hands when soap and water was not available for washing hands<br>18 Using disinfectant to clean surfaces at home or work or other places I attend frequently<br>19 Using homeopathic remedies<br>20 Reduce or avoid sending child(ren) to school or childcare<br>21 Shopping online for food and other necessities<br>22 Ensuring a balanced diet<br>23 Other | Binary for each option |

| Question                                                                                            | Type            | Option                                                                                                                                                                                                                                                                                                                                                                                                                                                                                                                                                                                                                                                                                                                                                                                                                                                                                                                                                                                                                                                               | Variable coded as      |
|-----------------------------------------------------------------------------------------------------|-----------------|----------------------------------------------------------------------------------------------------------------------------------------------------------------------------------------------------------------------------------------------------------------------------------------------------------------------------------------------------------------------------------------------------------------------------------------------------------------------------------------------------------------------------------------------------------------------------------------------------------------------------------------------------------------------------------------------------------------------------------------------------------------------------------------------------------------------------------------------------------------------------------------------------------------------------------------------------------------------------------------------------------------------------------------------------------------------|------------------------|
| What measures are you currently taking to reduce your risk from COVID-19?                           | Tick box        | 0 None<br>1 Working from home<br>2 I was unable to work<br>3 Restricting visitors to my home<br>4 Avoiding crowded places or large gatherings<br>5 Avoiding close contact with sick people in my home<br>6 Avoid using public transport<br>7 Reduce or avoid going to hospitals or going to the doctor unless required<br>8 Keeping 1.5m/6 feet or more between myself and others<br>9 Wearing a mask or P2 or N95<br>10 Wearing a homemade cloth mask<br>11 Wearing gloves<br>12 Avoiding touching my eyes, nose, and mouth with unwashed hands<br>13 Taken herbal supplements<br>14 Taken vitamins<br>15 Wearing a face shield<br>16 Washing my hands frequently<br>17 Using hand sanitizer to clean hands when soap and water was not available for washing hands<br>18 Using disinfectant to clean surfaces at home or work or other places I attend frequently<br>19 Using homeopathic remedies<br>20 Reduce or avoid sending child(ren) to school or childcare<br>21 Shopping online for food and other necessities<br>22 Ensuring a balanced diet<br>23 Other | Binary for each option |
| Have you ever worn a mask/N95/P2 during the COVID-19 pandemic?                                      | Multiple choice | 1 Yes<br>0 No                                                                                                                                                                                                                                                                                                                                                                                                                                                                                                                                                                                                                                                                                                                                                                                                                                                                                                                                                                                                                                                        | Binary                 |
| What level of trust do you have in the information about COVID-19 from your national government?    | Likert scale    | 4 Very High<br>3 High<br>2 Intermediate<br>1 Low<br>0 Very low                                                                                                                                                                                                                                                                                                                                                                                                                                                                                                                                                                                                                                                                                                                                                                                                                                                                                                                                                                                                       | Ordinal                |
| What level of trust do you have in the information about COVID-1 from your state/ local government? | Likert scale    | 4 Very High<br>3 High<br>2 Intermediate<br>1 Low<br>0 Very low                                                                                                                                                                                                                                                                                                                                                                                                                                                                                                                                                                                                                                                                                                                                                                                                                                                                                                                                                                                                       | Ordinal                |

| <b>Question</b>                                                                    | <b>Type</b>   | <b>Option</b> | <b>Variable coded as</b> |
|------------------------------------------------------------------------------------|---------------|---------------|--------------------------|
| What do you think is your level of risk of catching COVID-19 during this pandemic? | Sliding scale | Scale 1-100   | Numerical                |
| How effective did you think a surgical mask is at reducing your risk of COVID-19?  | Sliding scale | Scale 1-100   | Numerical                |
| How effective did you think a N95 or P2 mask is at reducing your risk of COVID-19? | Sliding scale | Scale 1-100   | Numerical                |
| How effective did you think a cloth mask is at reducing your risk of COVID-19?     | Sliding scale | Scale 1-100   | Numerical                |

**Table 1:** Percentage change of participant responses providing an internal validation between survey 1 and survey 2 for each city.

|                                                           | Sydney<br>Survey 1/Survey 2 | Melbourne<br>Survey 1/Survey 2 |
|-----------------------------------------------------------|-----------------------------|--------------------------------|
| None                                                      | -0.5                        | -3.4                           |
| Working from home                                         | 4.6                         | 11.6                           |
| I was unable to work                                      | 4.9                         | 1.9                            |
| Restricting visitors to my home                           | -5.5                        | -7.0                           |
| Avoiding crowded places or large gatherings               | -2.2                        | -10.4                          |
| Avoiding close contact with sick people in my home        | -2.3                        | 2.8                            |
| Avoid using public transport                              | 0.5                         | -7.5                           |
| Reduce or avoid going to hospitals or going to the doctor | -1.3                        | -4.5                           |
| Keeping 1.5m/6 feet or more between myself and others     | 4.3                         | -5.0                           |
| Wearing a mask or P2 or N95                               | 11.1                        | 19.6                           |
| Wearing a homemade cloth mask                             | 12.8                        | 15.8                           |
| Wearing gloves                                            | 1.8                         | -2.3                           |

**Table 2:** Demographic table, perceived effectiveness of masks and wearing of masks by survey respondents (n=700).

| <b>Mean age</b>                                        | <b>Years</b> |
|--------------------------------------------------------|--------------|
|                                                        | 46 ± 16.8    |
| <b>Gender</b>                                          | <b>N (%)</b> |
| Female                                                 | 351 (50.1%)  |
| Male                                                   | 348 (49.7%)  |
| Unspecified                                            | 1 (0.1%)     |
| <b>Pre-existing health conditions</b>                  | <b>N (%)</b> |
| Co-morbidities (such as diabetes, cancer, stroke etc.) | 334 (47.71)  |
| None                                                   | 559 (79.9)   |
| Pre-existing lung conditions                           | 186 (26.6)   |
| <b>COVID-19 mask perception</b>                        |              |
| Perceived effectiveness of masks (1–100)               |              |
| N95/P2 masks                                           | 62.2 ± 22.2  |
| Surgical masks                                         | 57.3 ± 22.3  |
| Cloth masks                                            | 50.0 ± 23.5  |
| <b>Wearing of masks over the nose and mouth</b>        | <b>N (%)</b> |
| No                                                     | 291 (41.6)   |
| Unsure/did not specify                                 | 277 (39.6)   |
| Yes                                                    | 132 (18.9)   |

Note: (i) Percentages may not add up to 100% in some questions because participants could choose more than one option. (ii) Mean ± SD were reported for sliding scale questions of 1–100, where 1 = minimum and 100 = maximum.
